# Supplementary material for: Intronic cleavage and polyadenylation regulates gene expression during DNA damage response through U1 snRNA
Source: PubMed Central journal article supplement (PMC4906801; doi:10.1038/celldisc.2016.13), 2016-06-14
Supplement: celldisc201613-s1.pdf [file celldisc201613-s1.pdf]

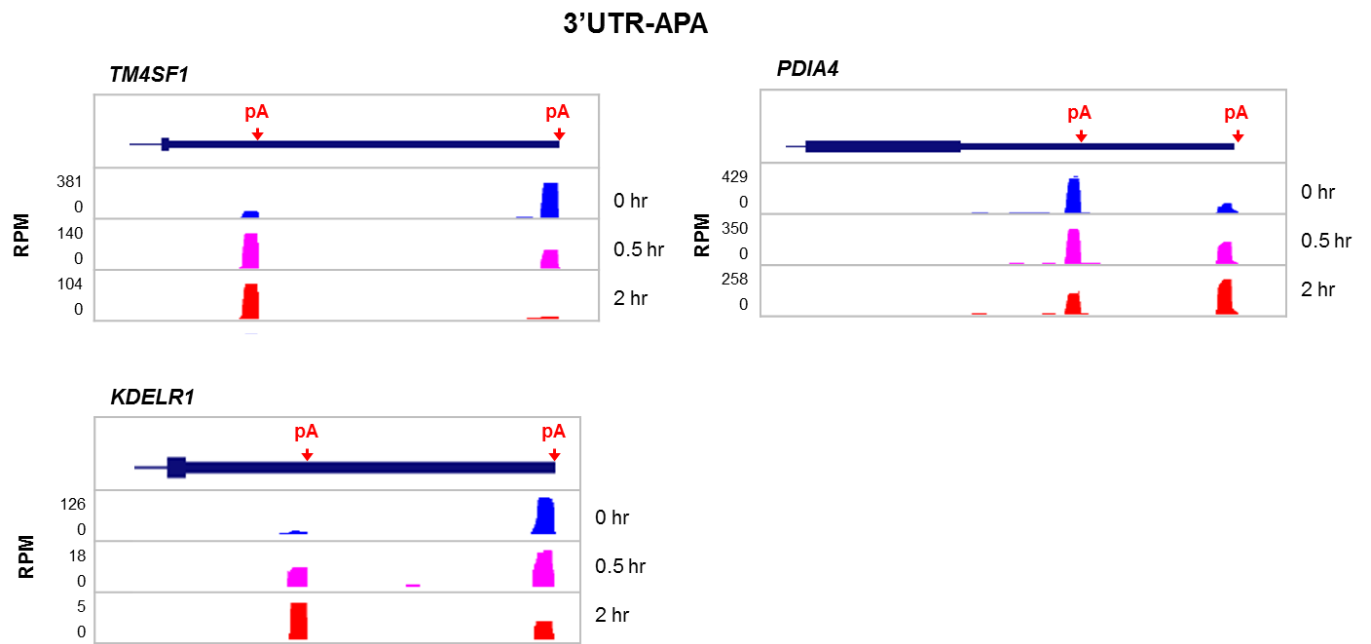

**Supplementary information, Figure S1. Examples of genes with regulated 3'UTR-APA in RKO cells.** Examples of 3'UTR-APA regulation. The zoomed-in 3'-most exon are shown on the top. pAs are indicated, and their RPM values at different time points are shown.

### Intron-APA

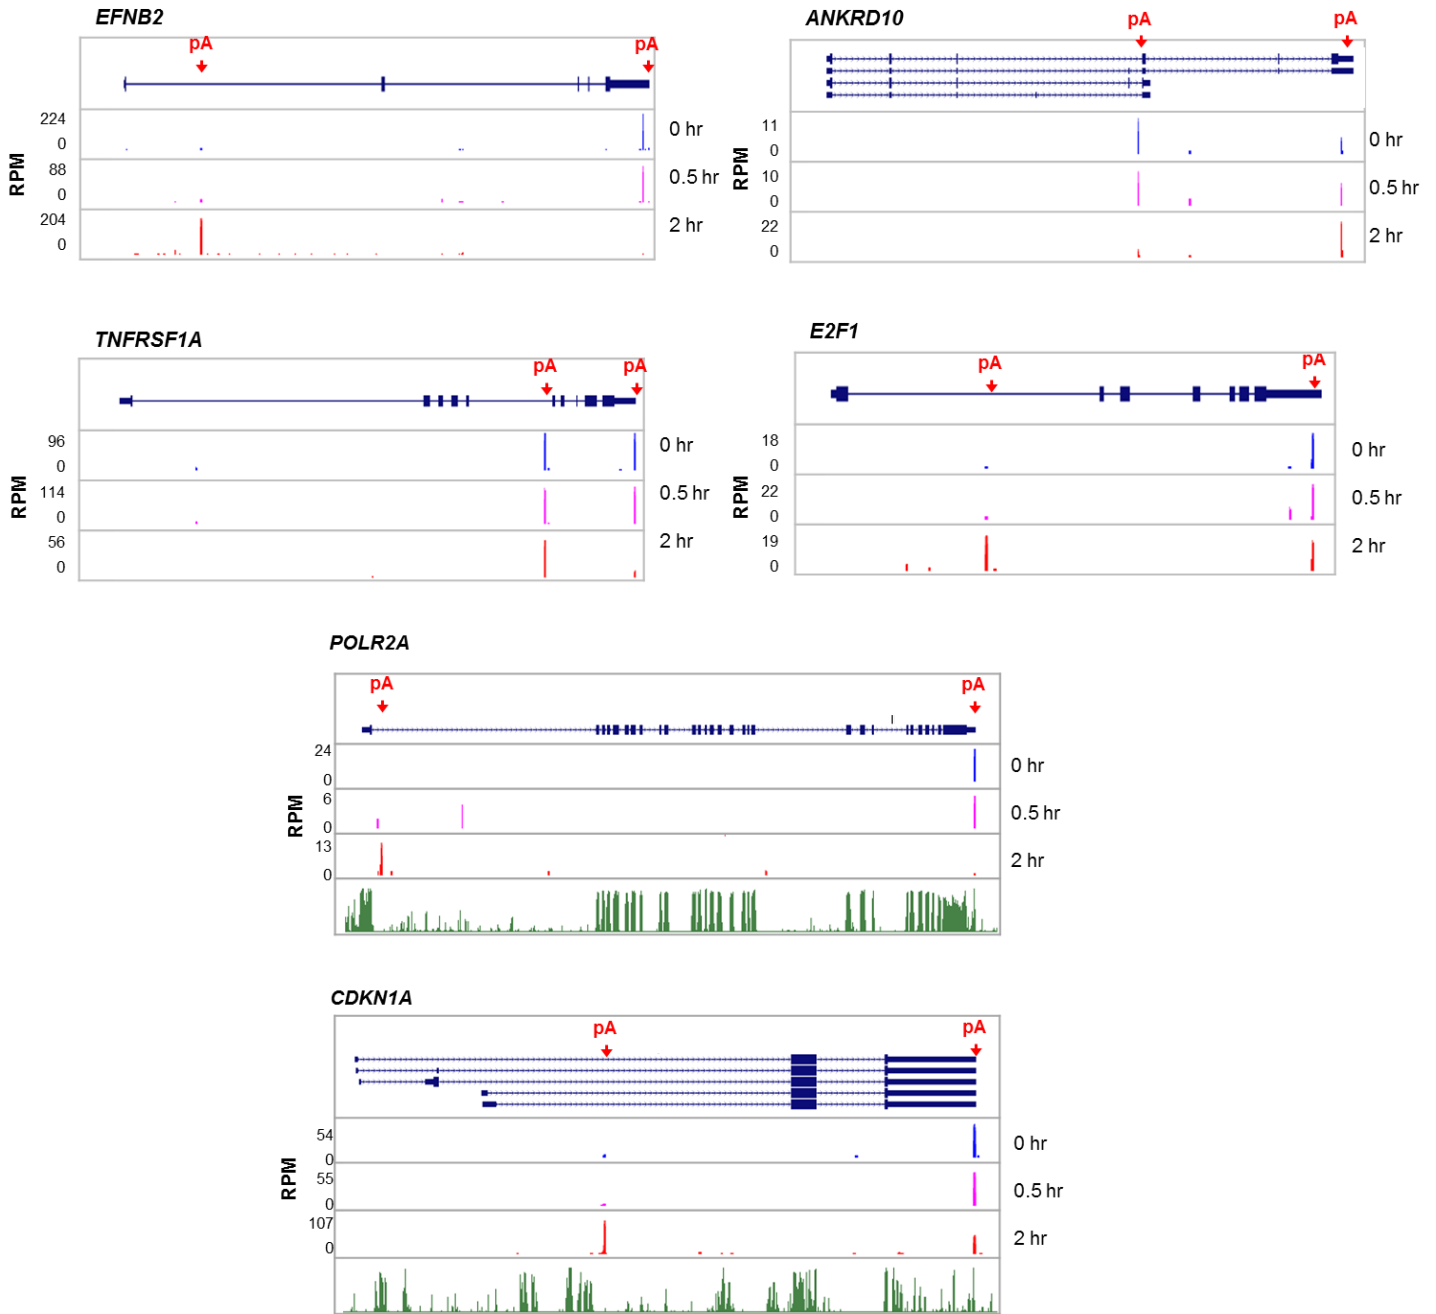

**Supplementary information, Figure S2 Examples of genes with regulated intronic-APA in RKO cells.** As in Figure S1 except that regulated intronic pAs are shown along with the major pA in 3'UTR. For *POLR2A* and *CDKN1A*, sequence conservation of the shown region (based on mammals) is indicated, with the height of line reflecting the degree of conservation.

**A**

|   | Associated Network Functions (IPA)                                                           | score |
|---|----------------------------------------------------------------------------------------------|-------|
| 1 | DNA Replication, Recombination, and Repair, Cell Cycle, Cellular Growth and Proliferation    | 31    |
| 2 | Cancer, Hematological System Development and Function, Organismal Functions                  | 29    |
| 3 | Protein Synthesis, Cell-To-Cell Signaling and Interaction, Cellular Growth and Proliferation | 28    |
| 4 | Gene Expression, Cell Cycle, Cellular Development                                            | 28    |
| 5 | Neurological Disease, Protein Degradation, Protein Synthesis                                 | 28    |

**B**

DNA Replication, Recombination, and Repair, Cell Cycle, Cellular Growth and Proliferation

Gene Expression, Cell Cycle, Cellular Development

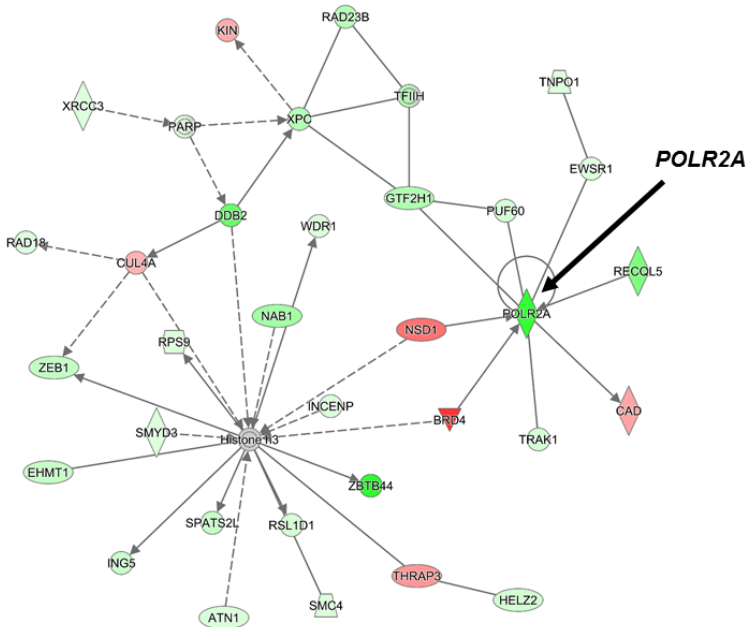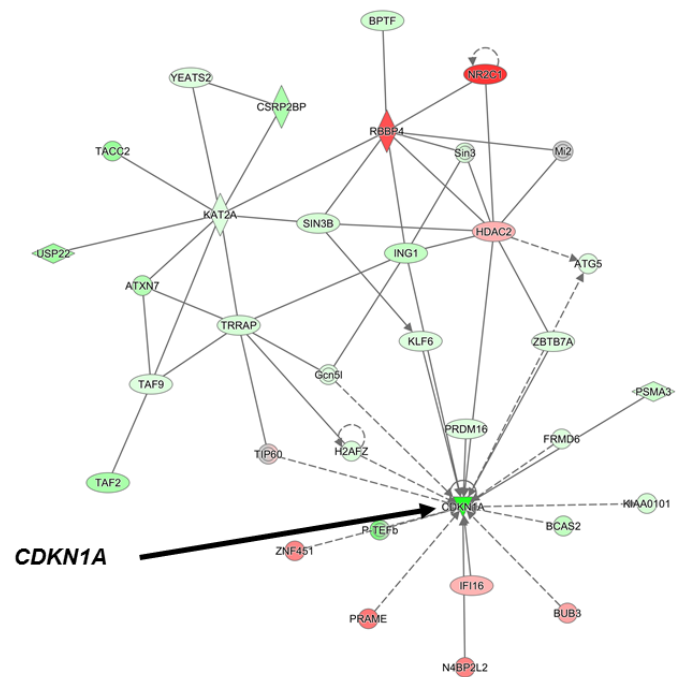

**Supplementary information, Figure S3 IPA network analysis of genes with upregulated intronic pA isoforms in RKO cells (A) Top 5 significant gene networks. (B) POLR2A (RNAP II) and CDKN1A (p21) are in the two significant networks. The color intensity of a node indicates the degree of its regulation. Red indicates downregulation of intronic pA isoform, green upregulation of intronic pA isoform, and gray no regulation. Dashed line indicates direct interaction of two genes, and dotted line indicates indirect interaction of two genes.**

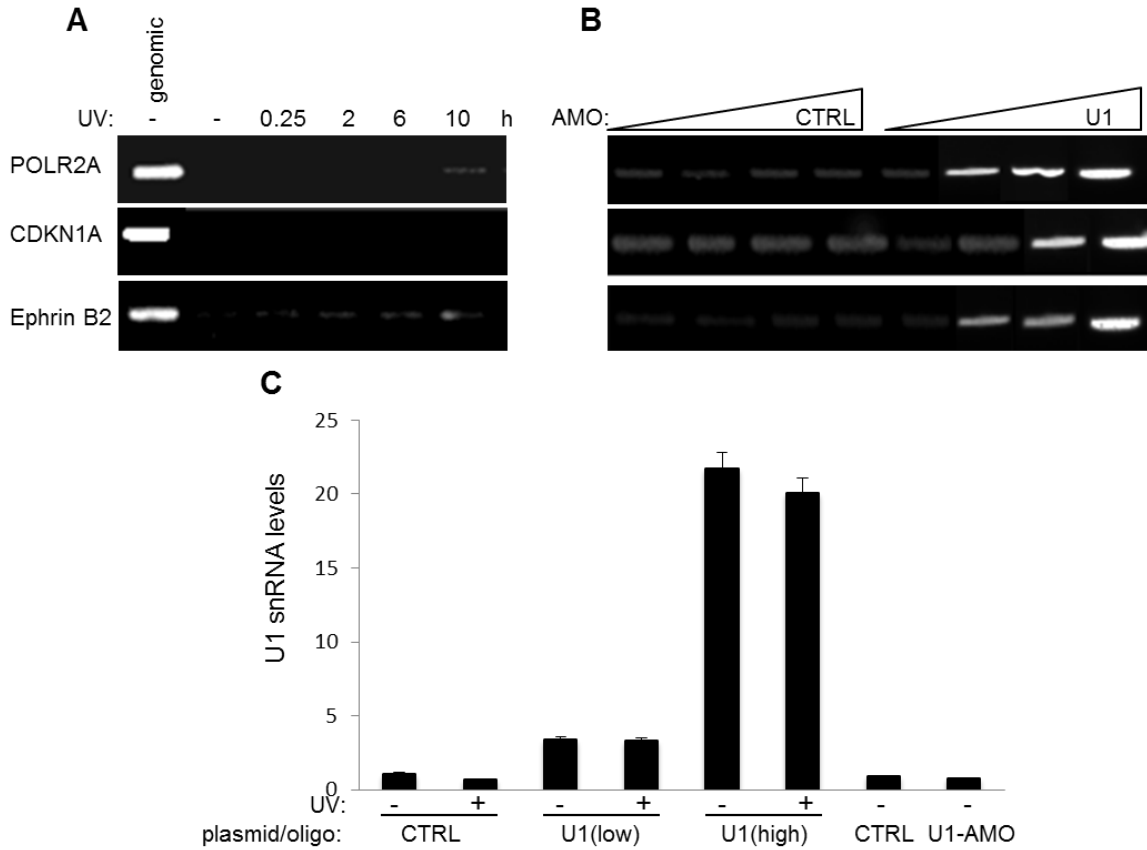

**Supplementary information, Figure S4. A) Second introns were not present in the mRNA isoforms from POLR2A, CDKN1A and Ephrin B2 isolated from UV treated cells.** HCT116 cells were treated with UV irradiation and allowed to recover for indicated times, and then harvested. cDNAs were prepared using oligo(dT) primers from nuclear RNA and used for PCR reaction with primers specific for second intron. Genomic DNA was also analyzed as control of the PCR reaction. A representative gel from three independent samples is shown. **B) Second introns were detected in the mRNA isoforms from POLR2A, CDKN1A and Ephrin B2 isolated from cells treated with different concentrations of U1 AMO.** Cell were treated with 10, 15, 20 or 25 nmoles of control oligo or U1 snRNA targeting morpholino oligonucleotides using scrape delivery method. **C) Determination of U1 snRNA levels decrease in different cellular conditions.** Samples from HCT116 cells transfected with 10 nmoles of control or anti-sense morpholino targeting U1 snRNA (U1 AMO) and UV treated were analyzed.

Samples HCT116 cells transfected with two concentrations (0.02  $\mu\text{g}$  or 1  $\mu\text{g}$ ) of either control or U1 snRNA expressing vectors, and UV treated, were also analyzed. Nuclear RNA was isolated and cDNA was prepared using random primers. qRT-PCR reaction was performed with primers specific for U1 snRNA. qRT-PCR products of actin were used as endogenous control. The qRT-PCR values were calculated from three biological samples by triplicate in each determination.

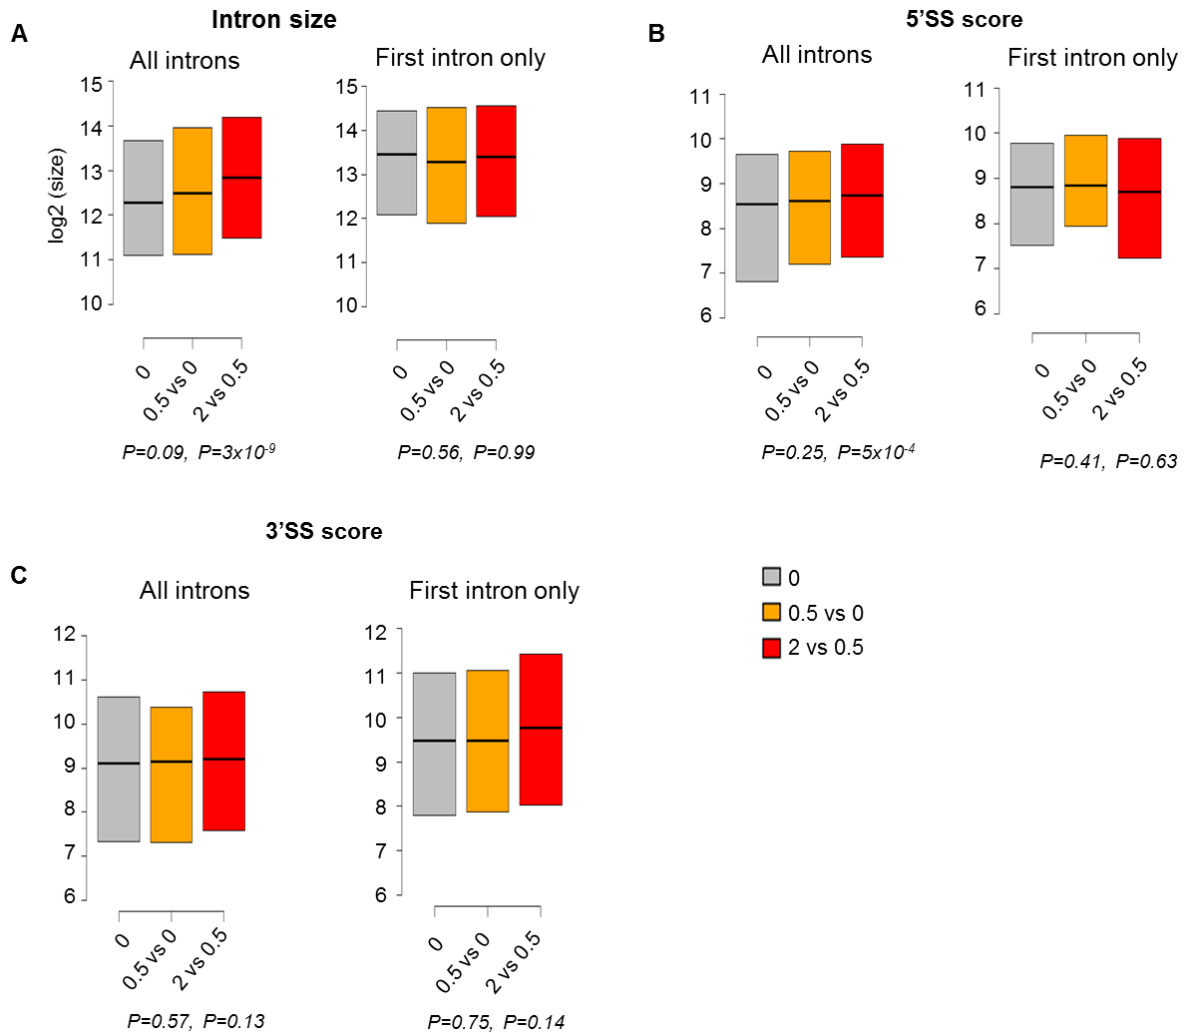

**Supplementary information, Figure S5. Features of introns containing pAs.** (A) Comparison of intron size. All introns containing pAs at 0 hr are used as control. Introns containing activated pAs are used for the 0.5 vs. 0 hr and 2 vs. 0.5 hr groups. All introns (left) or first introns only (right) are compared. P-values are derived from Wilcoxon test comparing with the control group (0 h) and two other groups. Single introns are excluded for this analysis. (B) Comparison of 5'splice site (5'SS) score. (C) Comparison of 3'SS score.

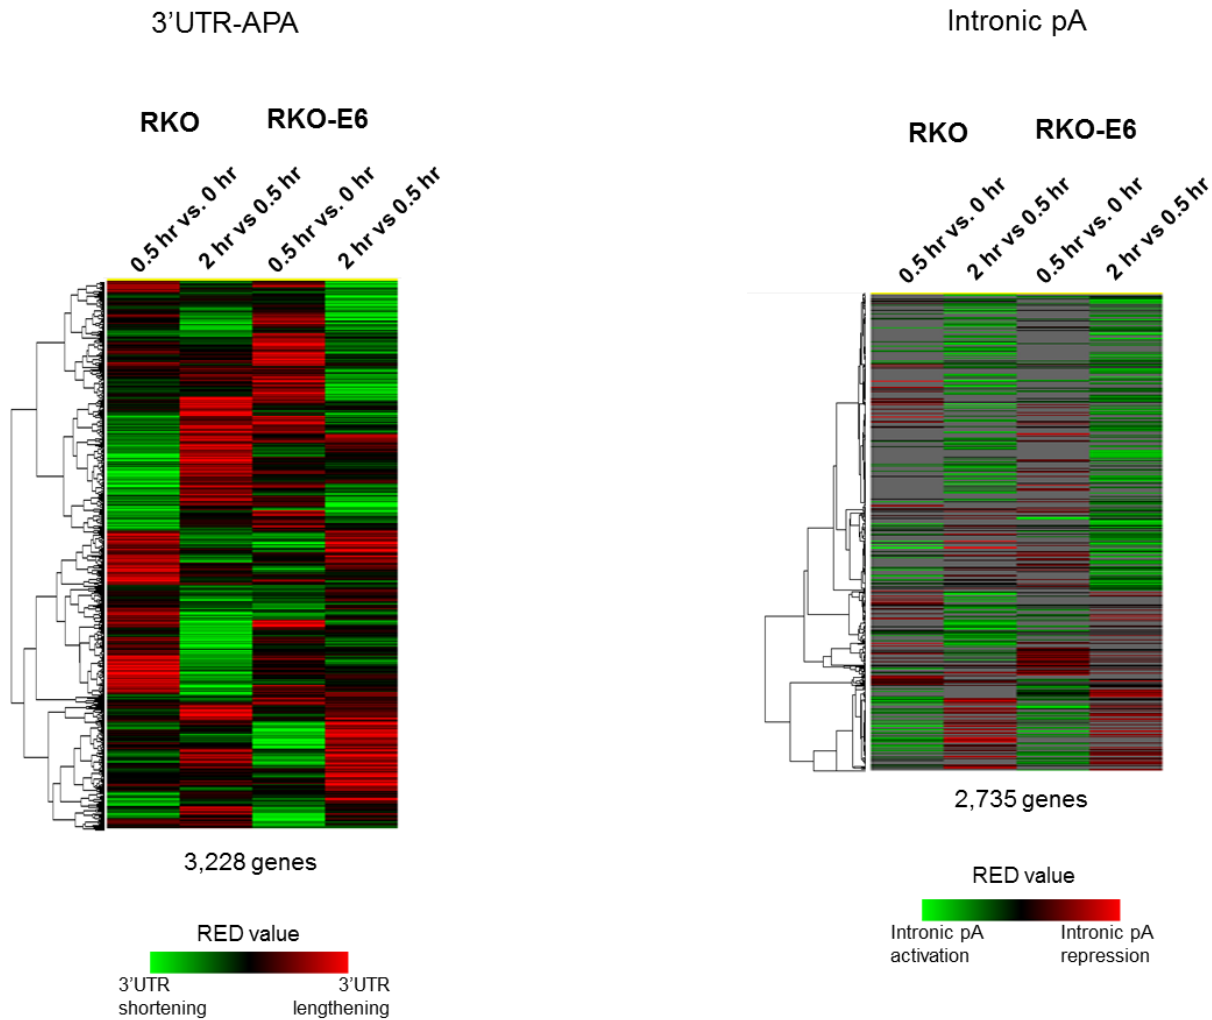

**Supplementary information, Figure S6. Heatmaps showing APA regulation in RKO and RKO-E6 cells.** Red and blue colors indicate upregulation and downregulation of distal pA compared to proximal pA. Gray color indicates 'NA' value which derives from no expression in one sample. Genes were clustered by hierarchical method using Pearson correlation coefficients. 3'UTR-APA (left panel) and intron-APA (right panel).

**Table 1. GO terms associated with genes with regulated 3'UTR-APA**

| GO ID      | GO name                                       | $-\log_{10}(P)$ |                |
|------------|-----------------------------------------------|-----------------|----------------|
|            |                                               | 0.5 vs. 0 hr    | 2.0 vs. 0.5 hr |
| GO:0045454 | cell redox homeostasis                        | 0.6             | 5.9            |
| GO:0070972 | protein localization to endoplasmic reticulum | 3.4             | 1.9            |
| GO:0019725 | cellular homeostasis                          | 1.0             | 3.2            |
| GO:0051051 | negative regulation of transport              | 3.2             | 0.1            |
| GO:0007565 | female pregnancy                              | 3.1             | 0.7            |
| GO:0033619 | membrane protein proteolysis                  | 3.0             | 0.8            |
| GO:0051128 | regulation of cellular component organization | 0.6             | 3.0            |
| GO:0009141 | nucleoside triphosphate metabolic process     | 0.4             | 2.9            |
| GO:0051588 | regulation of neurotransmitter transport      | 1.3             | 2.8            |
| GO:0043408 | regulation of MAPK cascade                    | 2.7             | 1.4            |

**Supplementary information, Table 1. Top GO terms associated with genes with regulated 3'UTR-APA.**



**Table 2. GO terms associated with genes with regulated intronic-APA**

| GO ID      | GO name                                                                                      | $-\log_{10}(P)$ |                |
|------------|----------------------------------------------------------------------------------------------|-----------------|----------------|
|            |                                                                                              | 0.5 vs. 0 hr    | 2.0 vs. 0.5 hr |
| GO:0006357 | regulation of transcription from RNA polymerase II promoter                                  | 0.1             | 5.3            |
| GO:0006974 | response to DNA damage stimulus                                                              | 0.0             | 4.0            |
| GO:0021761 | limbic system development                                                                    | 2.3             | 0.1            |
| GO:0006913 | nucleocytoplasmic transport                                                                  | 0.5             | 3.6            |
| GO:0045665 | negative regulation of neuron differentiation                                                | 0.2             | 3.5            |
| GO:0051896 | regulation of protein kinase B signaling cascade                                             | 3.3             | 0.3            |
| GO:0051817 | modification of morphology or physiology of other organism involved in symbiotic interaction | 3.3             | 1.3            |
| GO:0070588 | calcium ion transmembrane transport                                                          | 0.0             | 3.3            |
| GO:0006997 | nucleus organization                                                                         | 0.2             | 3.2            |
| GO:0042176 | regulation of protein catabolic process                                                      | 0.3             | 3.0            |

**Supplementary information, Table 2. Top GO terms associated with genes with regulated intronic-APA.**

**Table 3. Primers used in PCR reactions shown in Figure 2.**

| Gene      | Forward primer                                                                      | Reverse primer                                                                         |
|-----------|-------------------------------------------------------------------------------------|----------------------------------------------------------------------------------------|
| POLR2A    | 5'-TGCGCACCATCAAGAGAGTCCA-3'                                                        | intron-APA: 5-CCTCCTTCTCACCTCCAGCCA-3',<br>FL mRNA: 5'-GCGGCCAGTCCGCTCAATCA-3'.        |
| CDKN1A    | intron-APA: 5'-GGCGGAGAGCGGGATTACAAGT-3'<br>FL mRNA: 5'-TGAGAGGTTCTAAGAGTGCTGGGC-3' | intron-APA: 5'-AGGTGGTGGACACAGTGGCGTA-3'<br>FL mRNA: 5'-TGACAGCGATGGGAAGGAGCCA-3'      |
| Ephrin B2 | 5'-CGTGTGGAAGTACTGCTGGGGT-3'                                                        | intron-APA: 5'-AAAGGCGGAGAGACCGTCCGTT-3', FL<br>mRNA: 5'-CAGTTTTAGAGTCCACTTTGGGGCA-3'. |
| E2F1      | 5'- TGACCTGCTGCTCTTCGCCACA-3'                                                       | Intron-APA: 5'-CTGGCTTGAAGTCGCCAAAG-3'<br>FL mRNA: 5'-GTCAGTTTCAGGTCCAGCCT-3'          |
| DSCR3     | 5'-GGACCGCCCTGGACATCAAGAT-3'                                                        | Intron-APA: 5'-TCAAGGGGCCAGATGGGAAGAG-3'<br>FL mRNA: 5'-GTTACCTTCAAGTGCAGAGG-3'        |
| Notch1    | 5'-AACGTCTCCGACTGGTCCGA-3'                                                          | Proximal: 5'-TGGCATCCACAGAGCGCACACAGA-3'<br>Distal: 5'-GAAGGTGAGCCAGCTTTGCCT-3'        |
| KDELR1    | 5'-GGAAGGCGGCAGAAGATGAAGAG-3'                                                       | Proximal: 5'-CAAGACCTGGATCCTCCACTG-3'<br>Distal: 5'-GATGGGTGTCGGCAGATTTAGTG-3'         |
| DUSP6     | 5'-ACACCAAATCATGGGCTCACTT-3'                                                        | Proximal: 5'-GAGGTGACTCCCTGAAGAAT-3'<br>Distal: 5'-CCTTGCCCTACTATGCCTACAA-3'           |
| SNRPB2    | 5'-TAATCAGTTCCTGGCTTCAAGG-3'                                                        | Proximal: 5'-CACCAAGGCTAAAGAAACTGG-3'<br>Distal: 5'-GATGATAGGGAGATGGGTCAATC-3'         |

**Supplementary information, Table 3. Primers used in PCR reactions shown in Figure 2.**
